# Supplementary material for: Designing N-doped graphene-like supported highly dispersed bimetallic NiCoP NPs as an efficient electrocatalyst for water oxidation
Source: Royal Society of Chemistry journal article supplement (doi:10.1039/d3dt01090b), 2023-01-01
Supplement: d3dt01090b3.pdf [file d3dt01090b3.pdf]

## Designing N-doped graphene-like supported highly dispersed bimetallic NiCoP NPs as an efficient electrocatalyst for water oxidation

Jiabo Wang<sup>a, \*</sup>, Yalin Fu<sup>a</sup>, Peng Zhang<sup>a</sup>, Jie Zhang<sup>a</sup>, Xusen Ma<sup>a, c</sup>, Jibo Zhang<sup>a, \*</sup>, Li Chen<sup>b, \*</sup>

<sup>a</sup> Engineering Research Center of Jilin Provincial Higher Education University of Chemical Separation Technology, School of Petrochemical Technology, Jilin Institute of Chemical Technology, Jilin, 132022, P.R. China. E-mail: wangjb794@nenu.edu.cn

<sup>b</sup> Information Materials and Intelligent Sensing Laboratory of Anhui Province, Institutes of Physical Science and Information Technology, Anhui University, Hefei 230601, PR China. E-mail: lichen@ahu.edu.cn

<sup>c</sup> Wanhua Chemical Group Co., Ltd, Shandong, 264006, P.R. China

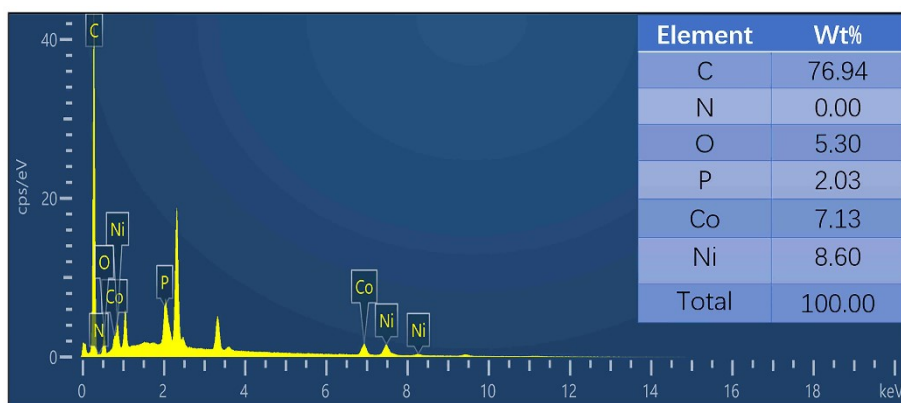

Figure S1 The EDS spectrum of NiCoP-3@GL.

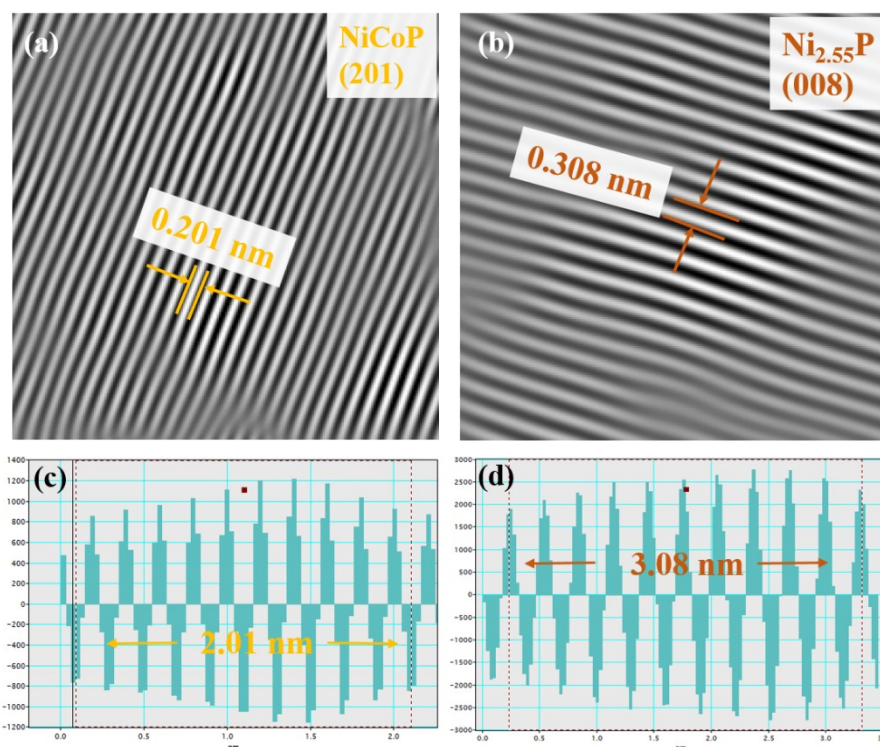Figure S2 (a-d) FFT patterns and lattice spacings from the locations of (c) NiCoP and (d)  $\text{Ni}_{2.55}\text{P}$  phases in Figure 3.

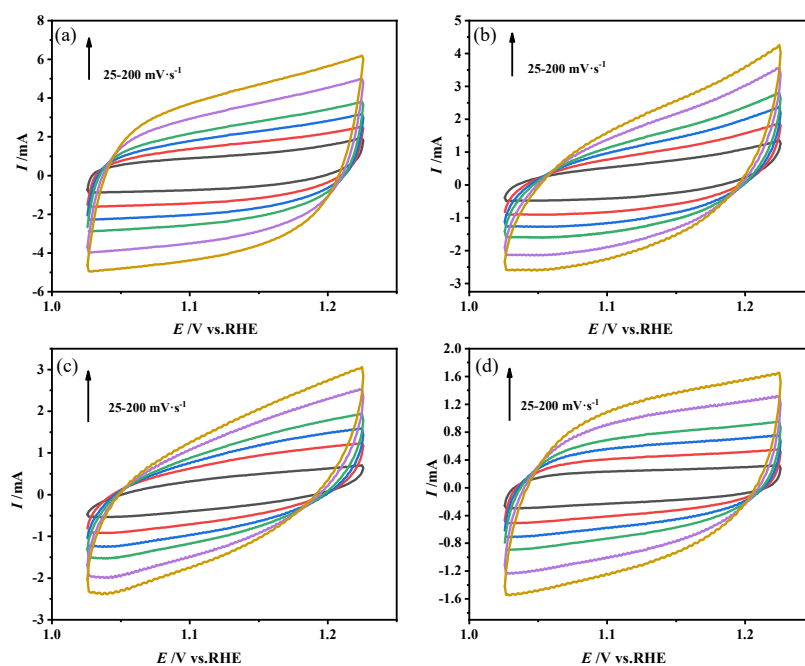

Figure S3 The CV curve of (a) NiCoP-3@GL, (b) NiP@GL, (c) CoP@GL, (d) CC.

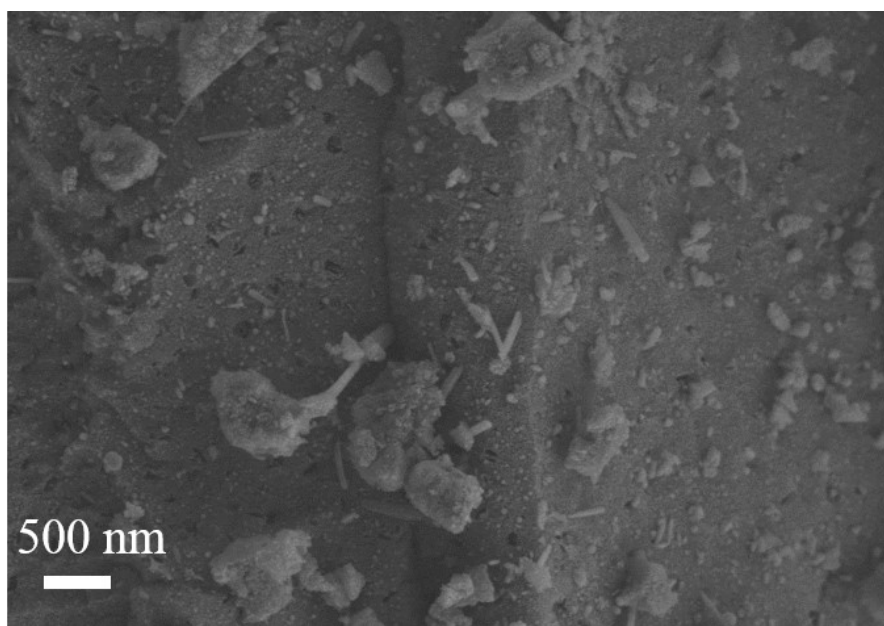

Figure S4 SEM image of NiCoP-3@GL sample after 5000 CV cycles.

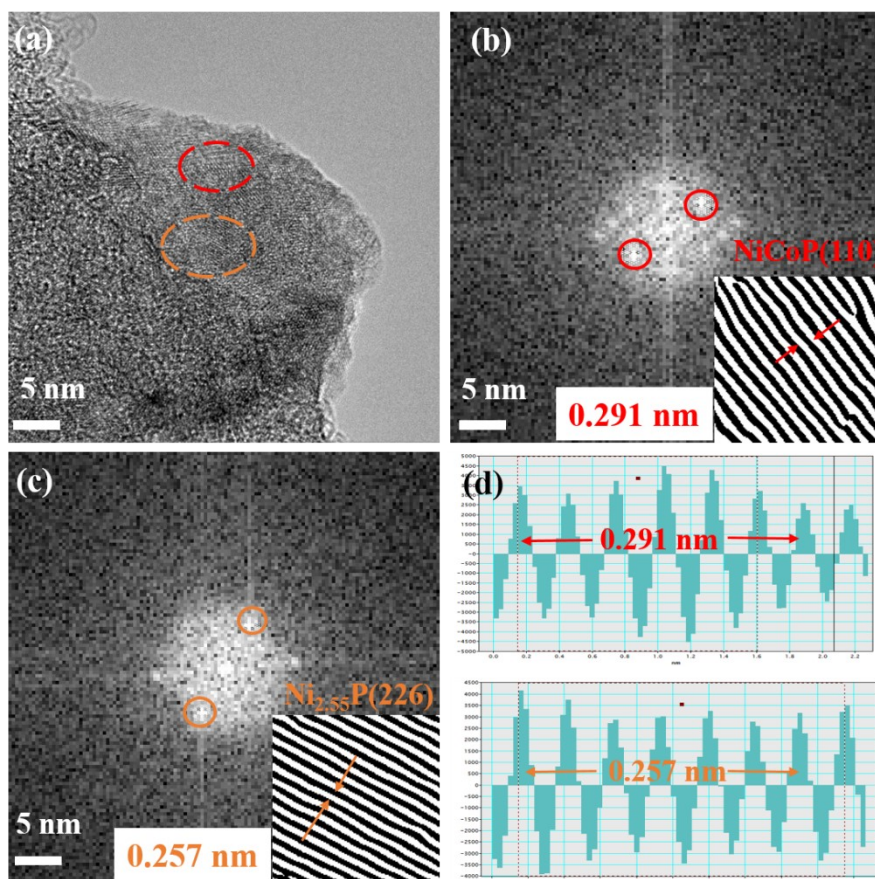

Figure S5 TEM image of NiCoP-3@GL sample after 5000 CV cycles.

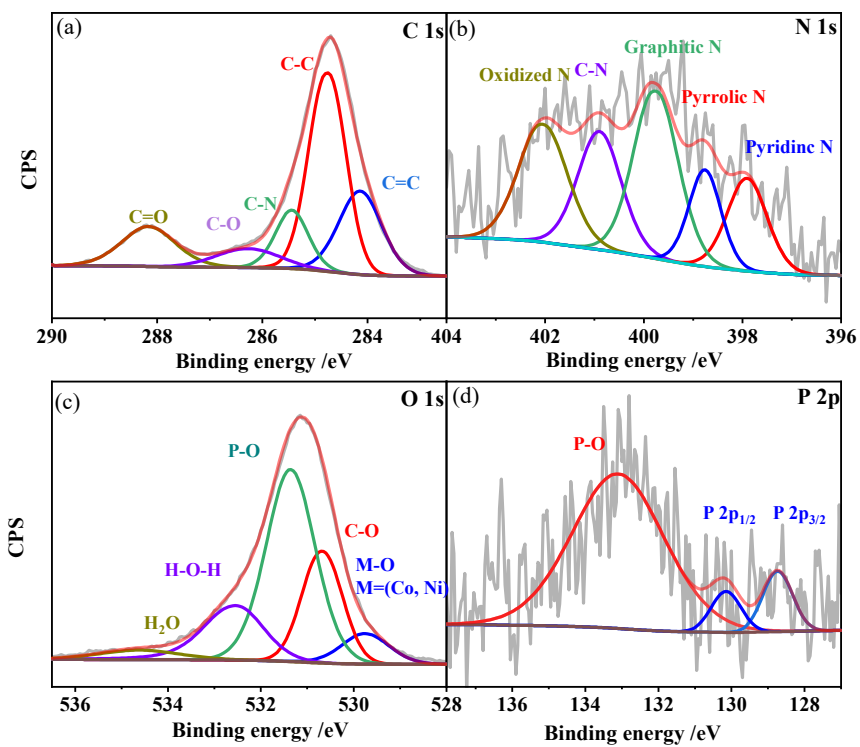

Figure S6 XPS of C 1s, N 1s, O 1s and P 2p of NiCoP-3@GL sample after 5000 CV cycles.

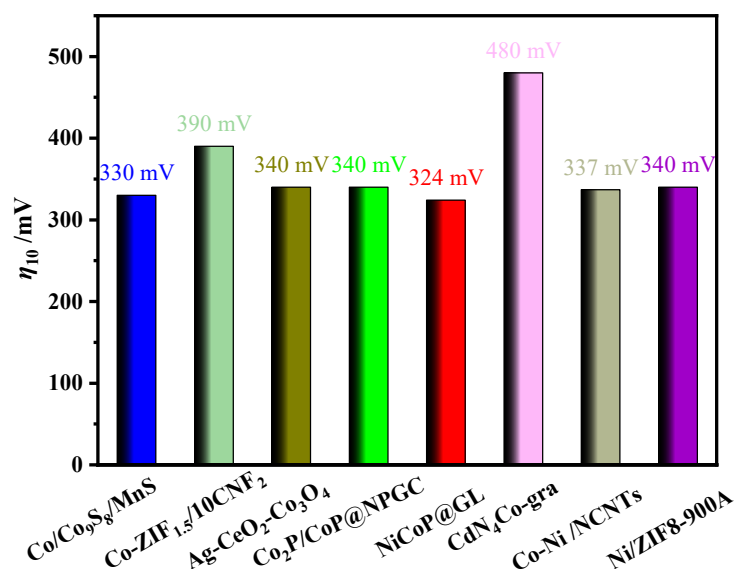

Figure S7 The comparison of catalytic performance of different cobalt-based and nickel-based electrocatalysts.

Table S1. NiCoP-x @GL, CoP@GL, NiP@GL, CC and RuO<sub>2</sub> overpotential and Tafel.

| Samples          | $\eta_{10}$<br>(mV vs. RHE) | $b$<br>(mV-dec <sup>-1</sup> ) |
|------------------|-----------------------------|--------------------------------|
| NiCoP-2@GL       | 355                         | 68.66                          |
| NiCoP-3@GL       | 324                         | 97.28                          |
| NiCoP-4@GL       | 353                         | 157.59                         |
| CoP@GL           | 507                         | 75.01                          |
| NiP@GL           | 473                         | 76.67                          |
| CC               | 525                         | 180.10                         |
| RuO <sub>2</sub> | 292                         | 52.19                          |

Table S2 Results of  $C_{dl}$ ,  $j_{ECSA}$  and  $j_{mass}$  of NiCoP-3@GL, CoP@GL, NiP@GL and CC in 1.0 M KOH solution.

| Samples    | $C_{dl}$<br>(mF cm <sup>-2</sup> ) | $ECSA$<br>(cm <sup>2</sup> ) | $\eta@j_{ECSA=0.002}$<br>(mV vs. RHE) | $\eta@j_{mass=2}$<br>(mV vs. RHE) |
|------------|------------------------------------|------------------------------|---------------------------------------|-----------------------------------|
| NiCoP-3@GL | 18.19                              | 452.75                       | 340                                   | 370                               |
| CoP@GL     | 6.70                               | 167.50                       | 459                                   | 590                               |
| NiP@GL     | 8.23                               | 205.75                       | 444                                   | 528                               |
| CC         | 5.63                               | 140.75                       | 444                                   |                                   |

Table S3 The electrochemical impedance fitting parameters for NiCoP-3@GL recorded in 1.0 M KOH solution.

|                                    |                        |
|------------------------------------|------------------------|
| $R_s$ ( $\Omega$ )                 | 8.006                  |
| $Q_1-Y_1$ ( $\mu S \cdot s^{-1}$ ) | $9.312 \cdot 10^{-4}$  |
| $n_1$ ( $0 < n_1 < 1$ )            | $8.616 \cdot 10^{-1}$  |
| $R_1$ ( $\Omega$ )                 | $1.00 \cdot 10^{-2}$   |
| $W(\Omega \cdot cm^2)$             | $3.059 \cdot 10^{-12}$ |
| $Q_2-Y_2$ ( $\mu S \cdot s^{-1}$ ) | $2.152 \cdot 10^{-3}$  |
| $n_2$ ( $0 < n_2 < 1$ )            | $3.994 \cdot 10^{-1}$  |
| $R_2$ ( $\Omega$ )                 | $3.139 \cdot 10^3$     |

Table S4. Overview of OER performance of recently reported Co-based Ni-based catalysts.

| Samples                                             | $\eta_{10}$<br>(mV vs. RHE) |
|-----------------------------------------------------|-----------------------------|
| Co/Co <sub>9</sub> S <sub>8</sub> /MnS              | 330                         |
| Co-ZIF <sub>1.5</sub> /10CNF <sub>2</sub>           | 390                         |
| Ag-CeO <sub>2</sub> -Co <sub>3</sub> O <sub>4</sub> | 340                         |
| Co <sub>2</sub> P/CoP@NPGC                          | 340                         |
| NiCoP-3@GL                                          | 324                         |
| CdN <sub>4</sub> Co-gra                             | 480                         |
| Co-Ni/NCNTs                                         | 337                         |
| Ni/ZIF8-900A                                        | 340                         |
